# Supplementary material for: Melanoma Detection by AFM Indentation of Histological Specimens
Source: Research Square preprint supplement (doi:10.21203/rs.3.rs-917257/v2), 2021-12-15
Supplement: Supplementary file 1 [file 49dd57ad87c6d799d57dec47.docx]

**Table 1.** Summary of mechanical analysis and histological examination of biopsied samples with patient information. The corresponding elasticity distributions are shown in Figure S6, S7, and S8).

**
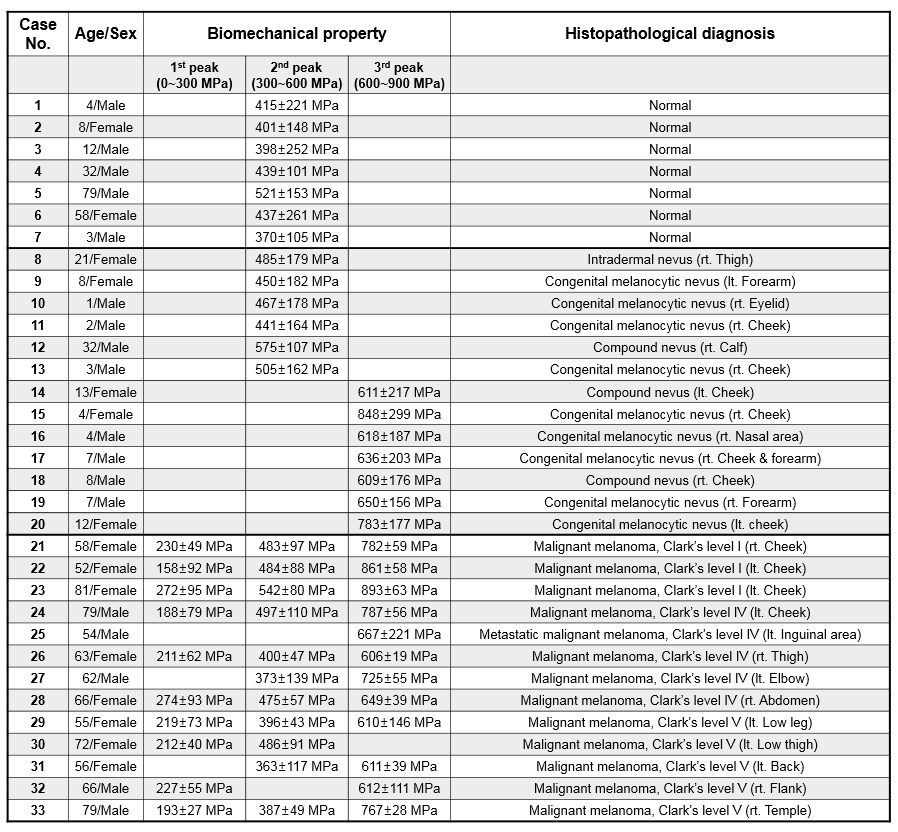
**
